# Supplementary material for: Intravenous Administration Is an Effective and Safe Route for Cancer Gene Therapy Using the Bifidobacterium-Mediated Recombinant HSV-1 Thymidine Kinase and Ganciclovir
Source: PubMed Central journal article supplement (PMC4926425; doi:10.3390/ijms17060891), 2016-06-06
Supplement: ijms-17-00891-s001.pdf [file ijms-17-00891-s001.pdf]

# Supplementary Materials: Intravenous Administration Is an Effective and Safe Route for Cancer Gene Therapy Using the *Bifidobacterium*-Mediated Recombinant HSV-1 Thymidine Kinase and Ganciclovir

Huicong Zhou, Zhiliang He, Changdong Wang, Tingting Xie, Lin Liu, Chuanyang Liu, Fangzhou Song and Yongping Ma

Table S1. Primers used in this study.

| Primers              | Sequence                      |
|----------------------|-------------------------------|
| GAPDH sense          | 5'-ACCACAGTCCATGCCATCAC-3'    |
| antisense            | 5'-TCCACCACCCTGTTGCTGTA-3'    |
| Caspase 6 sense      | 5'-GCCGATTGCTTTGTGTGTGT-3'    |
| Caspase6 antisense   | 5'-ACCATGAGCCGTTACAGTT-3'     |
| Caspase 7 sense      | 5'-GGGCCCATCAATGACACAGA-3'    |
| Caspase 7 antisense  | 5'-GTCTTTTCCGTGCTCCTCCA-3'    |
| Caspase 10 sense     | 5'-ACCAAAGAGGAAGTGGAGCG-3'    |
| Caspase 10 antisense | 5'-CTGCGGTAAGGCTTCCAAGA-3'    |
| Gas2 sense           | 5'-GCCCCTTCTCCTTACCTTC-3'     |
| Gas2 antisense       | 5'-CCTGCAAAAAGTTTCCCAGCC-3'   |
| HtrA2 sense          | 5'-AGGGGAGTTTGTGTTGCCA-3'     |
| HtrA2 antisense      | 5'-GGTCAGCATCATCACCCCAA-3'    |
| Lamin A sense        | 5'-CATGGAGATCCACGCCTACC-3'    |
| Lamin A antisense    | 5'-GGGAACCGGTAAGTCAGCAA-3'    |
| NIK sense            | 5'-CAGAAGGAACTCCCCAAGCCAAA-3' |
| NIK antisense        | 5'-CGACGCTTTCCTTCCAACA-3'     |
